# Supplementary material
Source: PubMed Central journal article supplement (PMC1482818)
Supplement: bj3960487add.pdf [file bj3960487add.pdf]

Supplementary Table 1. Variation in amide HN chemical shifts with pH for selected oligosaccharides.

Chemical shifts of high- and low-field components of each couplet are given, with their mean in bold  
 These data were fit to generate the  $pK_a$  values shown in Table 1.

A. Titration of  $HA_3^{NN}$

| pH          | 6.03         | 5.48         | 4.94         | 4.56         | 4.15         | 3.79         | 3.35         | 2.84         | 2.46         | 2.06         | 1.77         | 1.43         |
|-------------|--------------|--------------|--------------|--------------|--------------|--------------|--------------|--------------|--------------|--------------|--------------|--------------|
| $\beta$ HN  | 8.278        | 8.279        | 8.278        | 8.278        | 8.278        | 8.277        | 8.274        | 8.268        | 8.265        | 8.261        | 8.261        | 8.263        |
|             | 8.265        | 8.265        | 8.265        | 8.264        | 8.265        | 8.263        | 8.261        | 8.255        | 8.251        | 8.248        | 8.247        | 8.250        |
| ppm         | <b>8.272</b> | <b>8.272</b> | <b>8.272</b> | <b>8.271</b> | <b>8.272</b> | <b>8.270</b> | <b>8.268</b> | <b>8.262</b> | <b>8.258</b> | <b>8.255</b> | <b>8.254</b> | <b>8.257</b> |
| $\alpha$ HN | 8.194        | 8.195        | 8.194        | 8.194        | 8.194        | 8.193        | 8.191        | 8.187        | 8.184        | 8.182        | 8.182        | 8.184        |
|             | 8.182        | 8.182        | 8.181        | 8.181        | 8.181        | 8.180        | 8.179        | 8.174        | 8.172        | 8.169        | 8.169        | 8.171        |
| ppm         | <b>8.188</b> | <b>8.189</b> | <b>8.188</b> | <b>8.188</b> | <b>8.188</b> | <b>8.187</b> | <b>8.185</b> | <b>8.181</b> | <b>8.178</b> | <b>8.176</b> | <b>8.176</b> | <b>8.178</b> |
| $\omega$ HN | 7.955        | 7.956        | 7.957        | 7.958        | 7.963        | 7.970        | 7.989        | 8.026        | 8.050        | 8.076        | 8.087        | 8.095        |
|             | 7.942        | 7.943        | 7.943        | 7.945        | 7.949        | 7.957        | 7.976        | 8.013        | 8.037        | 8.063        | 8.074        | 8.082        |
| ppm         | <b>7.949</b> | <b>7.950</b> | <b>7.950</b> | <b>7.952</b> | <b>7.956</b> | <b>7.964</b> | <b>7.983</b> | <b>8.020</b> | <b>8.044</b> | <b>8.070</b> | <b>8.081</b> | <b>8.089</b> |

B. Titration of  $\Delta 4,5-HA_4$

| pH             | 6.03          | 4.98          | 4.46          | 4.08          | 3.78          | 3.43          | 3.04          | 2.64          | 2.19          | 1.82          | 1.43          |
|----------------|---------------|---------------|---------------|---------------|---------------|---------------|---------------|---------------|---------------|---------------|---------------|
| $\beta$ HN     | 8.279         | 8.279         | 8.278         | 8.277         | 8.276         | 8.273         | 8.27          | 8.265         | 8.261         | 8.262         | 8.262         |
|                | 8.265         | 8.265         | 8.265         | 8.264         | 8.262         | 8.26          | 8.256         | 8.252         | 8.248         | 8.248         | 8.248         |
| ppm            | <b>8.272</b>  | <b>8.272</b>  | <b>8.2715</b> | <b>8.2705</b> | <b>8.269</b>  | <b>8.2665</b> | <b>8.263</b>  | <b>8.2585</b> | <b>8.2545</b> | <b>8.255</b>  | <b>8.255</b>  |
| $\alpha$ HN    | 8.199         | 8.199         | 8.198         | 8.197         | 8.195         | 8.193         | 8.19          | 8.186         | 8.183         | 8.182         | 8.182         |
|                | 8.186         | 8.186         | 8.185         | 8.184         | 8.182         | 8.18          | 8.177         | 8.173         | 8.17          | 8.169         | 8.169         |
| ppm            | <b>8.1925</b> | <b>8.1925</b> | <b>8.1915</b> | <b>8.1905</b> | <b>8.1885</b> | <b>8.1865</b> | <b>8.1835</b> | <b>8.1795</b> | <b>8.1765</b> | <b>8.1755</b> | <b>8.1755</b> |
| $\omega$ HN    | 8.147         | 8.148         | 8.151         | 8.156         | 8.164         | 8.179         | 8.199         | 8.227         | 8.252         | 8.266         | 8.272         |
|                | 8.134         | 8.135         | 8.138         | 8.143         | 8.15          | 8.166         | 8.186         | 8.213         | 8.239         | 8.252         | 8.259         |
| ppm            | <b>8.1405</b> | <b>8.1415</b> | <b>8.1445</b> | <b>8.1495</b> | <b>8.157</b>  | <b>8.1725</b> | <b>8.1925</b> | <b>8.22</b>   | <b>8.2455</b> | <b>8.259</b>  | <b>8.2655</b> |
| vinyllic $^1H$ | 5.849         | 5.854         | 5.867         | 5.89          | 5.922         | 5.98          | 6.049         | 6.125         | 6.183         | 6.212         | 6.224         |

C. Titration of unlabelled  $HA_4$

| pH          | 6.06         | 5.60         | 5.21         | 4.85         | 4.51         | 4.14         | 3.78         | 3.48         | 3.08         | 2.73         | 2.41         | 2.10         | 1.76         | 1.40         |
|-------------|--------------|--------------|--------------|--------------|--------------|--------------|--------------|--------------|--------------|--------------|--------------|--------------|--------------|--------------|
| $\beta$ HN  | 8.279        | 8.279        | 8.279        | 8.279        | 8.278        | 8.278        | 8.275        | 8.274        | 8.270        | 8.265        | 8.262        | 8.260        | 8.260        | 8.261        |
|             | 8.265        | 8.266        | 8.266        | 8.265        | 8.265        | 8.264        | 8.261        | 8.260        | 8.256        | 8.251        | 8.249        | 8.247        | 8.246        | 8.248        |
| ppm         | <b>8.272</b> | <b>8.273</b> | <b>8.273</b> | <b>8.272</b> | <b>8.272</b> | <b>8.271</b> | <b>8.268</b> | <b>8.267</b> | <b>8.263</b> | <b>8.258</b> | <b>8.256</b> | <b>8.254</b> | <b>8.253</b> | <b>8.255</b> |
| $\alpha$ HN | 8.198        | 8.199        | 8.199        | 8.198        | 8.199        | 8.198        | 8.195        | 8.193        | 8.189        | 8.185        | 8.182        | 8.181        | 8.180        | 8.181        |
|             | 8.185        | 8.186        | 8.186        | 8.185        | 8.186        | 8.185        | 8.182        | 8.180        | 8.176        | 8.172        | 8.170        | 8.168        | 8.168        | 8.168        |
| ppm         | <b>8.192</b> | <b>8.193</b> | <b>8.193</b> | <b>8.192</b> | <b>8.193</b> | <b>8.192</b> | <b>8.189</b> | <b>8.187</b> | <b>8.183</b> | <b>8.179</b> | <b>8.176</b> | <b>8.175</b> | <b>8.174</b> | <b>8.175</b> |
| $\omega$ HN | 8.063        | 8.064        | 8.064        | 8.064        | 8.067        | 8.071        | 8.078        | 8.088        | 8.106        | 8.124        | 8.143        | 8.157        | 8.168        | 8.175        |
|             | 8.049        | 8.050        | 8.050        | 8.051        | 8.053        | 8.058        | 8.064        | 8.074        | 8.093        | 8.111        | 8.129        | 8.144        | 8.154        | 8.161        |
| ppm         | <b>8.056</b> | <b>8.057</b> | <b>8.057</b> | <b>8.058</b> | <b>8.060</b> | <b>8.065</b> | <b>8.071</b> | <b>8.081</b> | <b>8.100</b> | <b>8.118</b> | <b>8.136</b> | <b>8.151</b> | <b>8.161</b> | <b>8.168</b> |

D. Titration of  $^{15}N-HA_4$

| pH           | 6.11           | 5.05           | 4.42           | 4.06           | 3.66           | 3.26           | 2.97           | 2.65           | 2.32           | 1.92           | 1.67           | 1.4            |
|--------------|----------------|----------------|----------------|----------------|----------------|----------------|----------------|----------------|----------------|----------------|----------------|----------------|
| $\beta$ HN   | 8.274          | 8.273          | 8.272          | 8.272          | 8.269          | 8.266          | 8.263          | 8.260          | 8.256          | 8.254          | 8.253          | 8.252          |
|              | 8.261          | 8.260          | 8.259          | 8.259          | 8.256          | 8.253          | 8.250          | 8.247          | 8.243          | 8.241          | 8.240          | 8.239          |
| ppm          | <b>8.268</b>   | <b>8.267</b>   | <b>8.266</b>   | <b>8.266</b>   | <b>8.263</b>   | <b>8.260</b>   | <b>8.257</b>   | <b>8.254</b>   | <b>8.250</b>   | <b>8.248</b>   | <b>8.247</b>   | <b>8.246</b>   |
| $^{15}N$ ppm | <b>122.078</b> | <b>122.074</b> | <b>122.064</b> | <b>122.048</b> | <b>122.017</b> | <b>121.958</b> | <b>121.891</b> | <b>121.840</b> | <b>121.786</b> | <b>121.754</b> | <b>121.752</b> | <b>121.765</b> |
| $\alpha$ HN  | 8.194          | 8.193          | 8.192          | 8.192          | 8.189          | 8.186          | 8.183          | 8.180          | 8.176          | 8.174          | 8.174          | 8.172          |
|              | 8.181          | 8.180          | 8.179          | 8.179          | 8.176          | 8.173          | 8.170          | 8.167          | 8.164          | 8.162          | 8.161          | 8.159          |
| ppm          | <b>8.188</b>   | <b>8.187</b>   | <b>8.186</b>   | <b>8.186</b>   | <b>8.183</b>   | <b>8.180</b>   | <b>8.177</b>   | <b>8.174</b>   | <b>8.170</b>   | <b>8.168</b>   | <b>8.168</b>   | <b>8.166</b>   |
| $^{15}N$ ppm | <b>122.945</b> | <b>122.941</b> | <b>122.934</b> | <b>122.922</b> | <b>122.899</b> | <b>122.858</b> | <b>122.815</b> | <b>122.781</b> | <b>122.749</b> | <b>122.730</b> | <b>122.728</b> | <b>122.738</b> |
| $\omega$ HN  | 8.059          | 8.059          | 8.062          | 8.067          | 8.076          | 8.093          | 8.114          | 8.130          | 8.146          | 8.159          | 8.164          | 8.166          |
|              | 8.046          | 8.046          | 8.049          | 8.054          | 8.062          | 8.080          | 8.100          | 8.117          | 8.133          | 8.146          | 8.151          | 8.152          |
| ppm          | <b>8.053</b>   | <b>8.053</b>   | <b>8.056</b>   | <b>8.061</b>   | <b>8.069</b>   | <b>8.087</b>   | <b>8.107</b>   | <b>8.124</b>   | <b>8.140</b>   | <b>8.153</b>   | <b>8.158</b>   | <b>8.159</b>   |
| $^{15}N$ ppm | <b>122.145</b> | <b>122.136</b> | <b>122.112</b> | <b>122.072</b> | <b>122.001</b> | <b>121.867</b> | <b>121.718</b> | <b>121.604</b> | <b>121.486</b> | <b>121.403</b> | <b>121.379</b> | <b>121.377</b> |
| $\beta$ HN   | 8.059          | 8.059          | 8.062          | 8.066          | 8.073          | 8.088          | 8.108          | 8.125          | 8.142          | 8.157          | 8.163          | 8.164          |
|              | 8.046          | 8.046          | 8.049          | 8.053          | 8.059          | 8.075          | 8.095          | 8.112          | 8.129          | 8.144          | 8.149          | 8.152          |
| ppm          | <b>8.053</b>   | <b>8.053</b>   | <b>8.056</b>   | <b>8.060</b>   | <b>8.066</b>   | <b>8.082</b>   | <b>8.102</b>   | <b>8.119</b>   | <b>8.136</b>   | <b>8.151</b>   | <b>8.156</b>   | <b>8.158</b>   |
| $^{15}N$ ppm | <b>122.145</b> | <b>122.136</b> | <b>122.112</b> | <b>122.08</b>  | <b>122.013</b> | <b>121.885</b> | <b>121.742</b> | <b>121.63</b>  | <b>121.511</b> | <b>121.422</b> | <b>121.397</b> | <b>121.393</b> |

E. Titration of  $^{15}\text{N}$ -HA<sub>6</sub>

|                        |                |                |                |                |                |                |                |                |                |                |                |
|------------------------|----------------|----------------|----------------|----------------|----------------|----------------|----------------|----------------|----------------|----------------|----------------|
| pH                     | <b>6.11</b>    | <b>4.98</b>    | <b>4.41</b>    | <b>4.00</b>    | <b>3.60</b>    | <b>3.30</b>    | <b>2.96</b>    | <b>2.57</b>    | <b>2.21</b>    | <b>1.84</b>    | <b>1.42</b>    |
| $\beta$ HN             | 8.275          | 8.275          | 8.274          | 8.272          | 8.269          | 8.266          | 8.262          | 8.257          | 8.254          | 8.254          | 8.255          |
|                        | 8.262          | 8.262          | 8.261          | 8.259          | 8.256          | 8.253          | 8.248          | 8.244          | 8.242          | 8.241          | 8.242          |
| <b>ppm</b>             | <b>8.269</b>   | <b>8.269</b>   | <b>8.268</b>   | <b>8.266</b>   | <b>8.263</b>   | <b>8.260</b>   | <b>8.255</b>   | <b>8.251</b>   | <b>8.248</b>   | <b>8.248</b>   | <b>8.249</b>   |
| $^{15}\text{N}$ ppm    | <b>122.093</b> | <b>122.093</b> | <b>122.074</b> | <b>122.046</b> | <b>121.994</b> | <b>121.951</b> | <b>121.887</b> | <b>121.820</b> | <b>121.772</b> | <b>121.750</b> | <b>121.762</b> |
| $\alpha$ HN            | 8.196          | 8.196          | 8.195          | 8.193          | 8.190          | 8.187          | 8.182          | 8.178          | 8.176          | 8.175          | 8.175          |
|                        | 8.184          | 8.184          | 8.183          | 8.180          | 8.177          | 8.174          | 8.170          | 8.165          | 8.163          | 8.162          | 8.162          |
| <b>ppm</b>             | <b>8.190</b>   | <b>8.190</b>   | <b>8.189</b>   | <b>8.187</b>   | <b>8.184</b>   | <b>8.181</b>   | <b>8.176</b>   | <b>8.172</b>   | <b>8.170</b>   | <b>8.169</b>   | <b>8.169</b>   |
| $^{15}\text{N}$ ppm    | <b>122.956</b> | <b>122.950</b> | <b>122.941</b> | <b>122.920</b> | <b>122.884</b> | <b>122.855</b> | <b>122.811</b> | <b>122.769</b> | <b>122.741</b> | <b>122.728</b> | <b>122.740</b> |
| $\omega$ HN            | 8.048          | 8.050          | 8.055          | 8.063          | 8.078          | 8.090          | 8.108          | 8.127          | 8.145          | 8.159          | 8.167          |
|                        | 8.035          | 8.037          | 8.042          | 8.050          | 8.066          | 8.078          | 8.095          | 8.114          | 8.132          | 8.145          | 8.155          |
| <b>ppm</b>             | <b>8.042</b>   | <b>8.044</b>   | <b>8.049</b>   | <b>8.057</b>   | <b>8.072</b>   | <b>8.084</b>   | <b>8.102</b>   | <b>8.121</b>   | <b>8.139</b>   | <b>8.152</b>   | <b>8.161</b>   |
| $^{15}\text{N}$ ppm    | <b>122.109</b> | <b>122.095</b> | <b>122.066</b> | <b>122.009</b> | <b>121.908</b> | <b>121.824</b> | <b>121.699</b> | <b>121.569</b> | <b>121.470</b> | <b>121.406</b> | <b>121.384</b> |
| $\gamma^{\text{H}}$ HN | 8.057          | 8.058          | 8.062          | 8.068          | 8.080          | 8.092          | 8.109          | 8.128          | 8.144          | 8.155          | 8.162          |
|                        | 8.044          | 8.045          | 8.048          | 8.054          | 8.067          | 8.078          | 8.096          | 8.115          | 8.131          | 8.143          | 8.149          |
| <b>ppm</b>             | <b>8.051</b>   | <b>8.052</b>   | <b>8.055</b>   | <b>8.061</b>   | <b>8.074</b>   | <b>8.085</b>   | <b>8.103</b>   | <b>8.122</b>   | <b>8.138</b>   | <b>8.149</b>   | <b>8.156</b>   |
| $^{15}\text{N}$ ppm    | <b>122.000</b> | <b>121.989</b> | <b>121.966</b> | <b>121.919</b> | <b>121.830</b> | <b>121.754</b> | <b>121.637</b> | <b>121.510</b> | <b>121.405</b> | <b>121.339</b> | <b>121.317</b> |
| $\gamma^{\text{B}}$ HN | 8.057          | 8.058          | 8.062          | 8.065          | 8.076          | 8.086          | 8.103          | 8.124          | 8.141          | 8.153          | 8.162          |
|                        | 8.044          | 8.045          | 8.048          | 8.051          | 8.063          | 8.073          | 8.090          | 8.110          | 8.127          | 8.140          | 8.148          |
| <b>ppm</b>             | <b>8.051</b>   | <b>8.052</b>   | <b>8.055</b>   | <b>8.058</b>   | <b>8.070</b>   | <b>8.080</b>   | <b>8.097</b>   | <b>8.117</b>   | <b>8.134</b>   | <b>8.147</b>   | <b>8.155</b>   |
| $^{15}\text{N}$ ppm    | <b>122.000</b> | <b>121.989</b> | <b>121.966</b> | <b>121.928</b> | <b>121.844</b> | <b>121.773</b> | <b>121.661</b> | <b>121.535</b> | <b>121.429</b> | <b>121.357</b> | <b>121.332</b> |

F. Titration of GlcNAc

|             |              |              |              |              |              |              |              |
|-------------|--------------|--------------|--------------|--------------|--------------|--------------|--------------|
| pH          | <b>6.10</b>  | <b>5.99</b>  | <b>4.98</b>  | <b>3.99</b>  | <b>3.07</b>  | <b>2.29</b>  | <b>1.41</b>  |
| $\beta$ HN  | 8.180        | 8.180        | 8.180        | 8.180        | 8.180        | 8.181        | 8.184        |
|             | 8.167        | 8.167        | 8.167        | 8.167        | 8.167        | 8.168        | 8.172        |
| <b>ppm</b>  | <b>8.174</b> | <b>8.174</b> | <b>8.174</b> | <b>8.174</b> | <b>8.174</b> | <b>8.175</b> | <b>8.178</b> |
| $\alpha$ HN | 8.079        | 8.079        | 8.079        | 8.079        | 8.079        | 8.080        | 8.082        |
|             | 8.067        | 8.067        | 8.067        | 8.067        | 8.067        | 8.068        | 8.071        |
| <b>ppm</b>  | <b>8.073</b> | <b>8.073</b> | <b>8.073</b> | <b>8.073</b> | <b>8.073</b> | <b>8.074</b> | <b>8.077</b> |



*A (cont). Chemical shifts (ppm) and temperature coefficients at pH 6.0*

|                                  | T/K                     | H <sub>2</sub> O | $\beta$ HN | $\alpha$ HN | $\omega$ HN |
|----------------------------------|-------------------------|------------------|------------|-------------|-------------|
| HA <sub>0.5-1.5M</sub>           | 9.98                    | 4.916            | -          | -           | 8.139       |
|                                  | 24.41                   | 4.761            | -          | -           | 8.042       |
|                                  | 35.04                   | 4.650            | -          | -           | 7.970       |
|                                  | $\Delta\delta/\Delta T$ | <b>-10.6</b>     |            |             | <b>-6.7</b> |
|                                  | T/K                     | H <sub>2</sub> O | $\beta$ HN | $\alpha$ HN | $\omega$ HN |
| HA <sub>0.5-1.5M</sub><br>+ NaCl | 9.98                    | 4.908            | -          | -           | 8.138       |
|                                  | 24.41                   | 4.757            | -          | -           | 8.035       |
|                                  | 35.04                   | 4.645            | -          | -           | 7.965       |
|                                  | $\Delta\delta/\Delta T$ | <b>-10.5</b>     |            |             | <b>-6.9</b> |

*B. Chemical shifts (ppm) and temperature coefficients at pH 1.4*

|                               | T/K                     | H <sub>2</sub> O | $\beta$ HN           | $\alpha$ HN      | $\omega$ HN | $\beta$ HN             | $\alpha$ HN      |              |              |                        |
|-------------------------------|-------------------------|------------------|----------------------|------------------|-------------|------------------------|------------------|--------------|--------------|------------------------|
| GlcNAc                        | 9.98                    | 4.948            | 8.293                | 8.207            |             | 123.307                | 124.072          |              |              |                        |
|                               | 24.41                   | 4.792            | 8.181                | 8.078            |             | 123.047                | 123.772          |              |              |                        |
|                               | 35.04                   | 4.680            | 8.100                | 7.987            |             | 122.846                | 123.550          |              |              |                        |
|                               | $\Delta\delta/\Delta T$ | <b>-10.7</b>     | <b>-7.7</b>          | <b>-8.8</b>      |             | <b>-18.4</b>           | <b>-20.8</b>     |              |              |                        |
|                               | T/K                     | H <sub>2</sub> O | $\beta$ HN           | $\alpha$ HN      | $\omega$ HN |                        |                  |              |              |                        |
| HA <sub>3</sub> <sup>NN</sup> | 9.98                    | 4.939            | 8.368                | 8.311            | 8.214       |                        |                  |              |              |                        |
|                               | 24.41                   | 4.773            | 8.257                | 8.178            | 8.089       |                        |                  |              |              |                        |
|                               | 35.04                   | 4.671            | 8.176                | 8.083            | 7.998       |                        |                  |              |              |                        |
|                               | $\Delta\delta/\Delta T$ | <b>-10.7</b>     | <b>-7.7</b>          | <b>-9.1</b>      | <b>-8.6</b> |                        |                  |              |              |                        |
|                               | T/K                     | H <sub>2</sub> O | $\beta$ HN           | $\alpha$ HN      | $\omega$ HN | $\beta$ HN             | $\alpha$ HN      | $\omega$ HN  |              |                        |
| HA <sub>4</sub>               | 9.98                    | 4.929            | 8.360                | 8.301            | 8.281       | 122.007                | 123.035          | 121.724      |              |                        |
|                               | 24.41                   | 4.772            | 8.250                | 8.170            | 8.163       | 121.769                | 122.742          | 121.381      |              |                        |
|                               | 35.04                   | 4.666            | 8.169                | 8.075            | 8.077       | 121.585                | 122.530          | 121.131      |              |                        |
|                               | $\Delta\delta/\Delta T$ | <b>-10.5</b>     | <b>-7.6</b>          | <b>-9.0</b>      | <b>-8.1</b> | <b>-16.8</b>           | <b>-20.2</b>     | <b>-23.7</b> |              |                        |
|                               | T/K                     | H <sub>2</sub> O | $\beta$ HN           | $\alpha$ HN      | $\omega$ HN |                        |                  |              |              |                        |
| HA <sub>4</sub> + NaCl        | 9.98                    | 4.920            | 8.363                | 8.301            | 8.282       |                        |                  |              |              |                        |
|                               | 24.41                   |                  |                      |                  |             |                        |                  |              |              |                        |
|                               | 35.04                   | 4.659            | 8.177                | 8.081            | 8.081       |                        |                  |              |              |                        |
|                               | $\Delta\delta/\Delta T$ | <b>-10.4</b>     | <b>-7.4</b>          | <b>-8.8</b>      | <b>-8.0</b> |                        |                  |              |              |                        |
|                               | T/K                     | H <sub>2</sub> O | $\beta$ HN           | $\alpha$ HN      | $\omega$ HN | vinyllic               |                  |              |              |                        |
| $\Delta 4,5$ -HA4             | 9.98                    | 4.935            | 8.367                | 8.308            | 8.383       | 6.232                  |                  |              |              |                        |
|                               | 24.41                   | 4.771            | 8.255                | 8.178            | 8.266       | 6.224                  |                  |              |              |                        |
|                               | 35.04                   | 4.670            | 8.180                | 8.082            | 8.181       | 6.219                  |                  |              |              |                        |
|                               | $\Delta\delta/\Delta T$ | <b>-10.6</b>     | <b>-7.5</b>          | <b>-9.0</b>      | <b>-8.1</b> | <b>-5.2</b>            |                  |              |              |                        |
|                               | T/K                     | H <sub>2</sub> O | $\gamma^{\alpha}$ HN | $\gamma\beta$ HN | $\omega$ HN | $\gamma^{\alpha}$ HN   | $\gamma\beta$ HN | $\omega$ HN  |              |                        |
| HA <sub>5</sub> <sup>AA</sup> | 9.98                    | 4.925            | 8.278                | 8.282            | 8.285       | 121.588                | 121.657          | 121.776      |              |                        |
|                               | 24.41                   | 4.764            | 8.155                | 8.157            | 8.162       | 121.243                | 121.311          | 121.427      |              |                        |
|                               | 35.04                   | 4.658            | 8.071                | 8.073            | 8.078       | 121.000                | 121.068          | 121.182      |              |                        |
|                               | $\Delta\delta/\Delta T$ | <b>-10.7</b>     | <b>-8.3</b>          | <b>-8.4</b>      | <b>-8.3</b> | <b>-23.5</b>           | <b>-23.5</b>     | <b>-23.7</b> |              |                        |
|                               | T/K                     | H <sub>2</sub> O | $\beta$ HN           | $\alpha$ HN      | $\omega$ HN | $\gamma$ HN            | $\beta$ HN       | $\alpha$ HN  | $\omega$ HN  | $\gamma$ HN            |
| HA <sub>6</sub>               | 9.98                    | 4.928            | 8.360                | 8.301            | 8.279       | 8.276                  | 122.002          | 123.033      | 121.727      | 121.650                |
|                               | 24.41                   | 4.763            | 8.248                | 8.170            | 8.162       | 8.156                  | 121.765          | 122.741      | 121.384      | 121.319                |
|                               | 35.04                   | 4.663            | 8.169                | 8.075            | 8.075       | 8.070                  | 121.584          | 122.531      | 121.139      | 121.076                |
|                               | $\Delta\delta/\Delta T$ | <b>-10.6</b>     | <b>-7.6</b>          | <b>-9.0</b>      | <b>-8.1</b> | <b>-8.2</b>            | <b>-16.7</b>     | <b>-20.0</b> | <b>-23.5</b> | <b>-22.9</b>           |
|                               | T/K                     | H <sub>2</sub> O | $\beta$ HN           | $\alpha$ HN      | $\omega$ HN | $\gamma$ HN/ $\psi$ HN | $\beta$ HN       | $\alpha$ HN  | $\omega$ HN  | $\gamma$ HN/ $\psi$ HN |
| HA <sub>6</sub>               | 9.98                    | 4.928            | 8.361                | 8.302            | 8.280       | 8.275                  | 122.000          | 123.034      | 121.727      | 121.657                |
|                               | 24.41                   | 4.770            | 8.249                | 8.169            | 8.161       | 8.155                  | 121.763          | 122.741      | 121.386      | 121.327                |
|                               | 35.04                   | 4.661            | 8.168                | 8.075            | 8.074       | 8.068                  | 121.579          | 122.529      | 121.136      | 121.082                |
|                               | $\Delta\delta/\Delta T$ | <b>-10.7</b>     | <b>-7.7</b>          | <b>-9.1</b>      | <b>-8.2</b> | <b>-8.3</b>            | <b>-16.8</b>     | <b>-20.2</b> | <b>-23.6</b> | <b>-22.9</b>           |

*B (cont). Chemical shifts (ppm) and temperature coefficients at pH 1.4*

|                                  |       |                  |             |             |             |  |  |  |  |  |  |
|----------------------------------|-------|------------------|-------------|-------------|-------------|--|--|--|--|--|--|
|                                  | T/K   | H <sub>2</sub> O | βHN         | αHN         | ωHN         |  |  |  |  |  |  |
| HA <sub>40</sub>                 | 9.98  |                  |             |             |             |  |  |  |  |  |  |
|                                  | 24.41 | 4.777            | 8.254       | 8.181       | 8.159       |  |  |  |  |  |  |
|                                  | 35.04 | 4.666            | 8.175       | 8.086       | 8.073       |  |  |  |  |  |  |
|                                  | Δδ/ΔT | <b>-10.4</b>     | <b>-7.4</b> | <b>-8.9</b> | <b>-8.1</b> |  |  |  |  |  |  |
|                                  | T/K   | H <sub>2</sub> O | βHN         | αHN         | ωHN         |  |  |  |  |  |  |
| HA <sub>40</sub> + NaCl          | 9.98  |                  |             |             |             |  |  |  |  |  |  |
|                                  | 24.41 | 4.764            | 8.253       | -           | 8.153       |  |  |  |  |  |  |
|                                  | 35.04 | 4.654            | 8.175       | -           | 8.068       |  |  |  |  |  |  |
|                                  | Δδ/ΔT | <b>-10.3</b>     | <b>-7.3</b> |             | <b>-8.0</b> |  |  |  |  |  |  |
|                                  | T/K   | H <sub>2</sub> O | βHN         | αHN         | ωHN         |  |  |  |  |  |  |
| HA <sub>0.5-1.5M</sub>           | 9.98  |                  | -           | -           |             |  |  |  |  |  |  |
|                                  | 24.41 | 4.778            | -           | -           | 8.157       |  |  |  |  |  |  |
|                                  | 35.04 | 4.667            | -           | -           | 8.071       |  |  |  |  |  |  |
|                                  | Δδ/ΔT | <b>-10.4</b>     |             |             | <b>-8.1</b> |  |  |  |  |  |  |
|                                  | T/K   | H <sub>2</sub> O | βHN         | αHN         | ωHN         |  |  |  |  |  |  |
| HA <sub>0.5-1.5M</sub><br>+ NaCl | 9.98  | 4.915            | -           | -           | 8.266       |  |  |  |  |  |  |
|                                  | 24.41 | 4.761            | -           | -           | 8.150       |  |  |  |  |  |  |
|                                  | 35.04 | 4.652            | -           | -           | 8.067       |  |  |  |  |  |  |
|                                  | Δδ/ΔT | <b>-10.5</b>     |             |             | <b>-7.9</b> |  |  |  |  |  |  |
